# Supplementary material for: Enhanced Photodynamic Efficacy Using 1,8-Naphthalimides: Potential Application in Antibacterial Photodynamic Therapy
Source: MDPI journal article supplement (doi:10.3390/molecules27185743), 2022-09-06
Supplement: s1 [file s1]

## Supporting Information

Article

# Enhanced Photodynamic Efficacy Using 1,8-Naphthalimides: Potential Application in Antibacterial Photodynamic Therapy

Desislava Staneva <sup>1</sup>, Awad I. Said <sup>2,3</sup>, Evgenia Vasileva-Tonkova <sup>4</sup> and Ivo Grabchev <sup>3,\*</sup>

<sup>1</sup> Department of Textile, Leather and Fuels, University of Chemical Technology and Metallurgy, 1756 Sofia, Bulgaria

<sup>2</sup> Chemistry Department, Faculty of Science, Assiut University, Assiut 71516, Egypt

<sup>3</sup> Department of Chemistry and biochemistry, physiology and pathophysiology, Faculty of Medicine, Sofia University "St. Kliment Ohridski", 1407 Sofia, Bulgaria

<sup>4</sup> The Stephan Angeloff Institute of Microbiology, Bulgarian Academy of Sciences, 1113 Sofia, Bulgaria

\* Correspondence: i.grabchev@chem.uni-sofia.bg

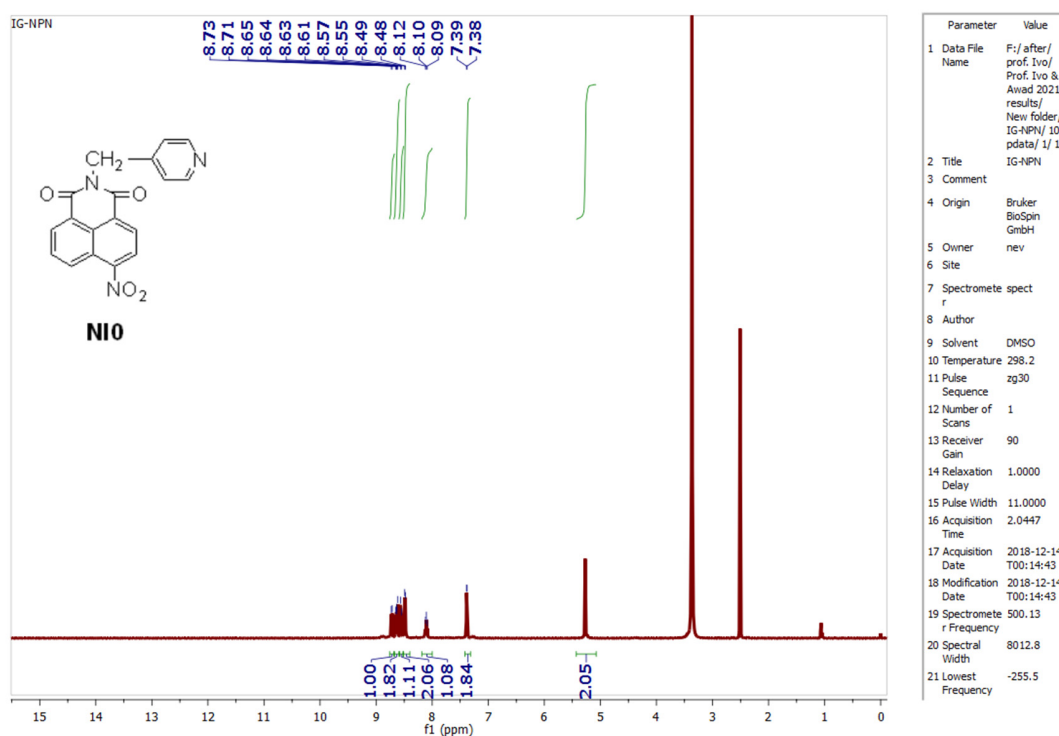

Figure S1. <sup>1</sup>H-NMR spectrum of N10.

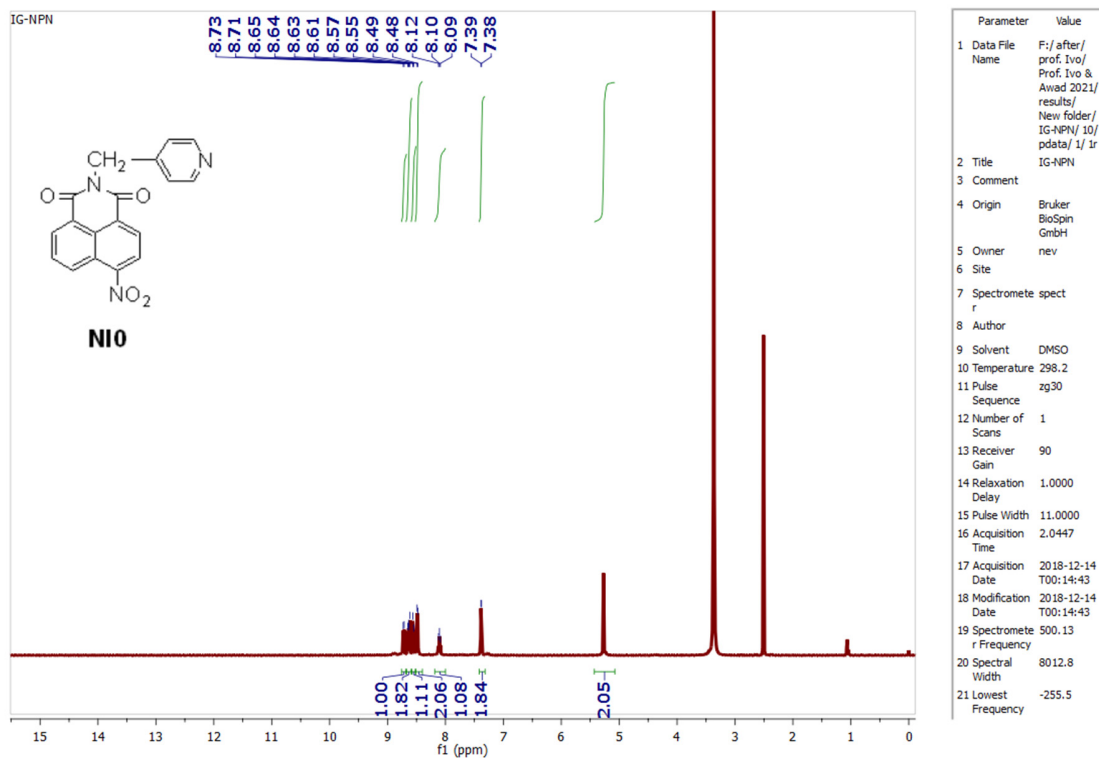

Figure S2.  $^{13}\text{C}$ -NMR spectrum of N10.

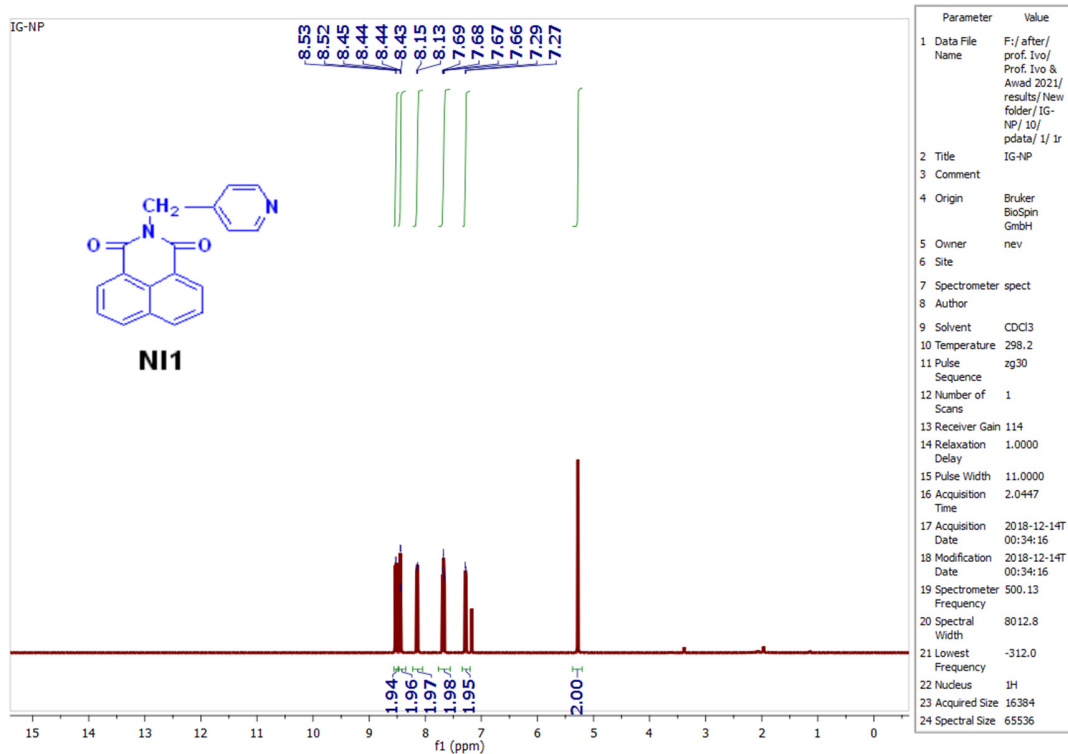

Figure S3.  $^1\text{H}$ -NMR spectrum of N11.

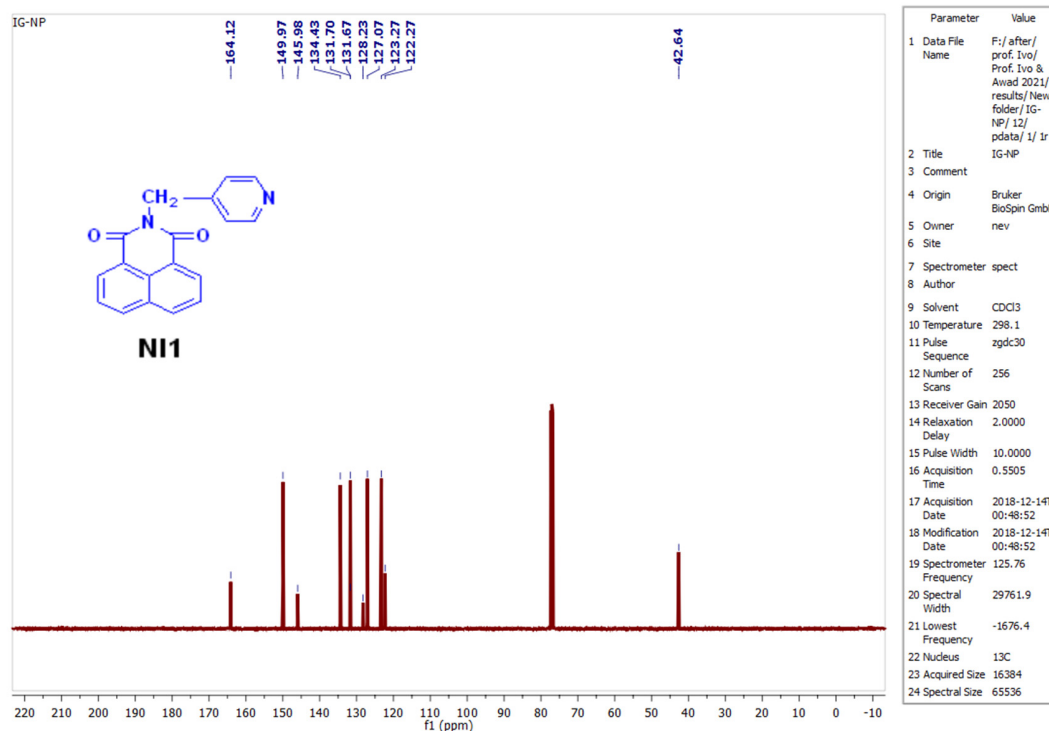

Figure S4. <sup>13</sup>C-NMR spectrum of NI1.

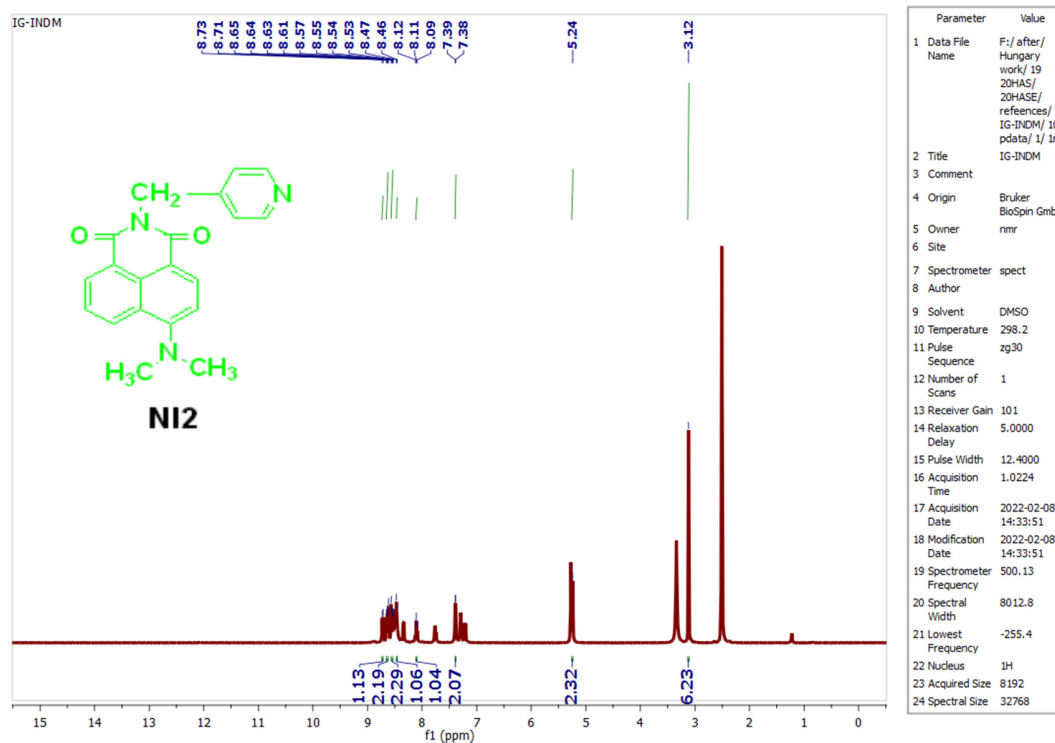

Figure S5. <sup>1</sup>H-NMR spectrum of NI2.

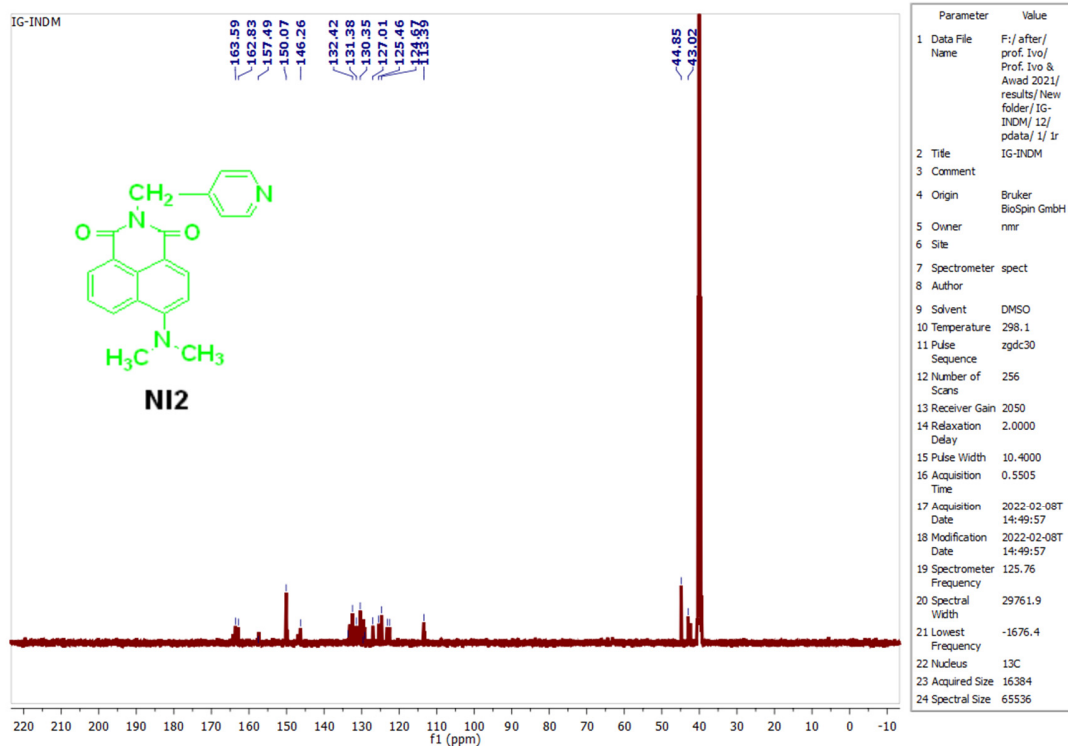

**Figure S6.**  $^{13}\text{C}$ -NMR spectrum of NI2.

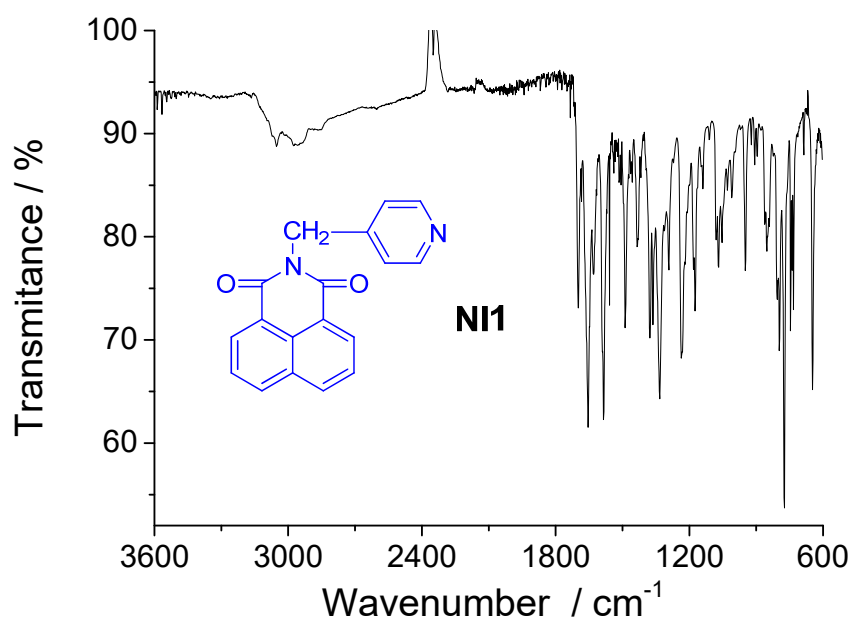

**Figure S7.** FTIR spectrum of **NI1**.

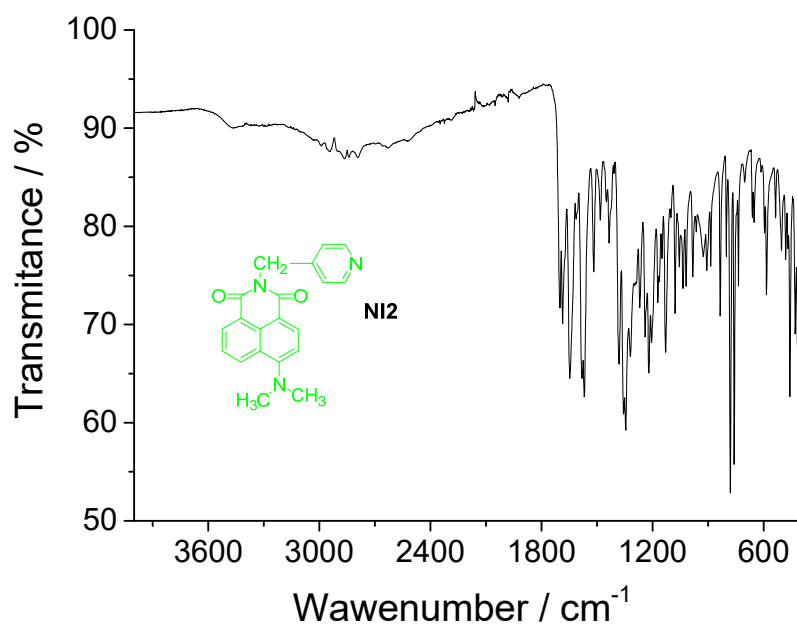

**Figure S8.** FTIR spectrum of **NI2**.
